# Supplementary material for: Focused, high accuracy 5-methylcytosine quantitation with base resolution by benchtop next-generation sequencing
Source: PubMed Central journal article supplement (PMC3907040; doi:10.1186/1756-8935-6-33), 2013-10-11
Supplement: 1756-8935-6-33-S3.pdf [file 1756-8935-6-33-S3.pdf]

| <b>Run</b>             | <b>Cluster Density<br/>(K/mm<sup>2</sup>)</b> | <b>Clusters PF (%)</b> | <b>Total paired<br/>Reads PF (M)</b> | <b>Total % ≥Q30</b> |
|------------------------|-----------------------------------------------|------------------------|--------------------------------------|---------------------|
| <b>Rat Standards</b>   | 520 ± 4                                       | 96.83 ± 0.15           | 8.42                                 | 91.7                |
| <b>Mouse Standards</b> | 1287 ± 7                                      | 90.67 ± 0.89           | 21.62                                | 82.4                |
| <b>RHO</b>             | 929 ± 8                                       | 93.33 ± 0.75           | 16.44                                | 83.1                |

**Supplemental Table 1:** MiSeq run summaries. Single lane flow cell cluster densities, the percent clusters passing filter, total paired reads passing filter, and total percent reads above Q30.
