# Supplementary material for: Focused, high accuracy 5-methylcytosine quantitation with base resolution by benchtop next-generation sequencing
Source: PubMed Central journal article supplement (PMC3907040; doi:10.1186/1756-8935-6-33), 2013-10-11
Supplement: 1756-8935-6-33-S4.pdf [file 1756-8935-6-33-S4.pdf]

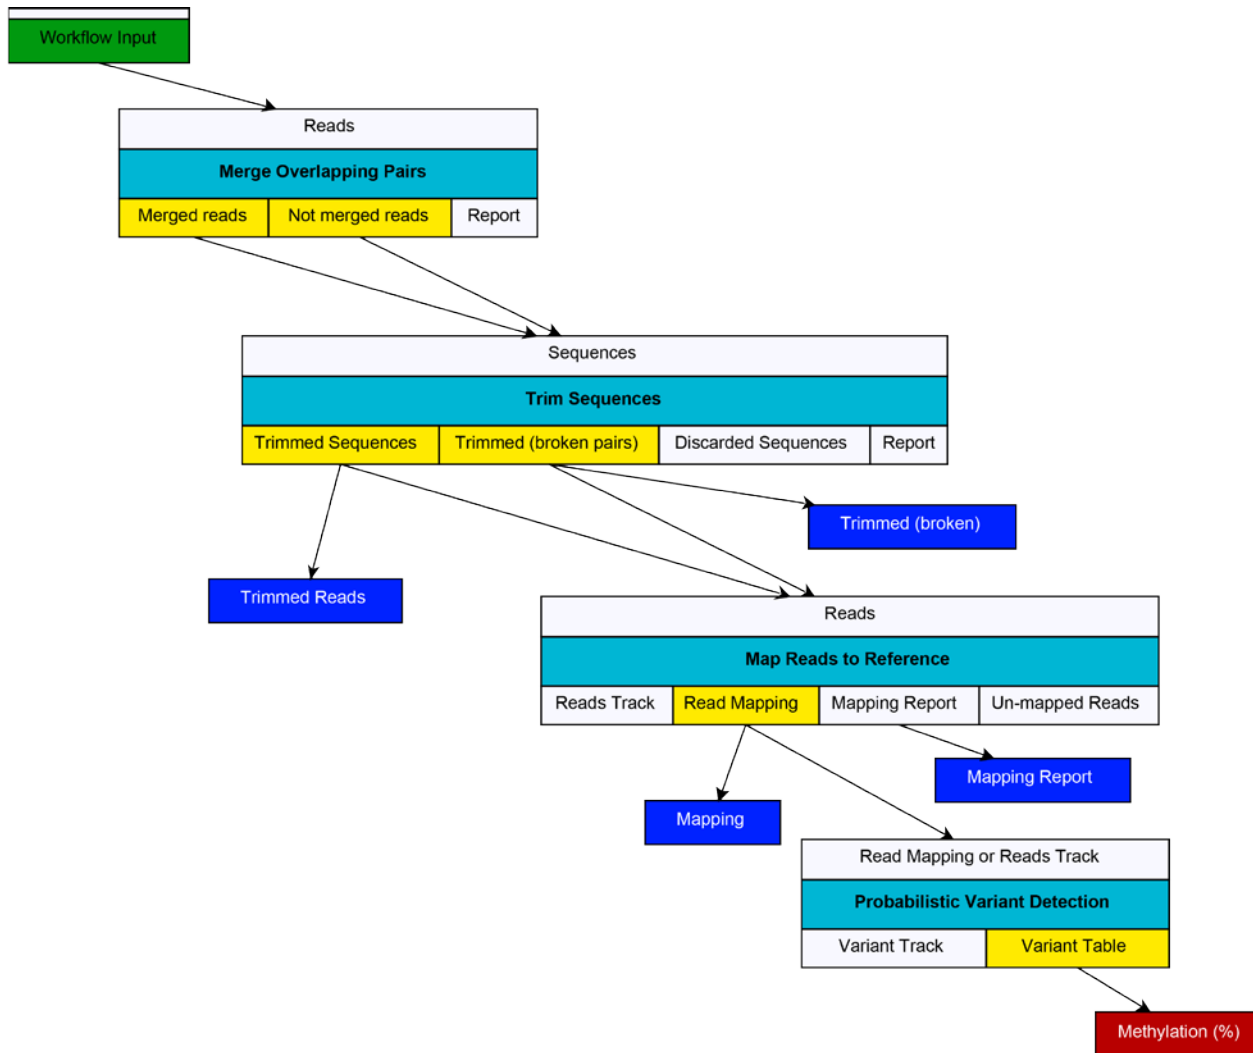

**Supplemental Figure 1:** Methylation quantitation workflow schematic. FastQ files are imported for workflow input. Reads are then merged to eliminate overlapping pairs. Sequences are then quality trimmed and mapped to a reference sequence. Variant detection is used to identify CpG sites and the percent cytosine methylation.
